# Supplementary material for: Deficiency in DGCR8-dependent canonical microRNAs causes infertility due to multiple abnormalities during uterine development in mice
Source: PubMed Central journal article supplement (PMC4735737; doi:10.1038/srep20242), 2016-02-02

Deficiency in DGCR8-dependent canonical microRNAs causes infertility due to multiple abnormalities during uterine development in mice

Yeon Sun Kim<sup>1</sup>, Hye-Ryun Kim<sup>1</sup>, Hyongbum Kim<sup>2</sup>, Seung Chel Yang<sup>1</sup>, Mira Park<sup>1</sup>,  
Jung Ah Yoon<sup>3</sup>, Hyunjung J Lim<sup>4</sup>, Seok-Ho Hong<sup>5</sup>, Francesco J DeMayo<sup>6</sup>,  
John P Lydon<sup>6</sup>, Youngsok Choi<sup>1</sup>, Dong Ryul Lee<sup>1,3</sup>, Haengseok Song<sup>1,3,\*</sup>

<sup>1</sup>Department of Biomedical Science, CHA University, Seongnam, Gyeonggi, Korea

<sup>2</sup>Department of Pharmacology and Brain Korea 21 PLUS Project for Medical Science,  
Yonsei University College of Medicine, Seoul 120-752, Korea

<sup>3</sup>Fertility Center of CHA Gangnam Medical Center, CHA University, Seoul, Korea

<sup>4</sup>Department of Veterinary Medicine, College of Veterinary Medicine, Konkuk University,  
Seoul, 143-701 Korea

<sup>5</sup>Department of Internal Medicine, School of Medicine, Stem Cell Institute, Kangwon National  
University, Chuncheon, Kangwon 200-701, Korea

<sup>6</sup>Department of Molecular and Cellular Biology, Baylor College of Medicine, Houston, Texas,  
USA

\*Correspondence should be addressed to: H Song, Ph.D. ([hssong@cha.ac.kr](mailto:hssong@cha.ac.kr)) at Department of Biomedical Science, CHA University (Tel: 82-31-881-7150, Fax: 82-31-881-7249).

**Figure S1. Gross histology and gonadotropin production in *Dgcr8<sup>d/d</sup>* mice.** Gross histology (a) and RT-PCR results for FSH $\beta$  and LH $\beta$  subunits (b) expressed in the pituitary of *Dgcr8<sup>d/d</sup>* mice. The bottom panel in (a) shows higher-magnification images of the boxed area in the top panel. Scale bar: 50  $\mu$ m.

**Figure S2. Histologic examination for acute immune responses in reproductive organs of *Dgcr8<sup>d/d</sup>* mice injected with oil.** (a) Gross morphology of female reproductive organs in *Dgcr8<sup>fl/fl</sup>* and *Dgcr8<sup>d/d</sup>* mice 12 h after oil injection into uterine horns at post-hCG 9 h. Scale bar: 5 mm. (b) Histological analyses of female reproductive organs shown in (a). Note that there are no inflammatory cells such as neutrophils and eosinophils presented in Figure 3. Scale bar: 100  $\mu$ m.

**Figure S3. Expression profiles of miRNA biogenesis factors in mouse uterus.** RT-PCR (a) and realtime RT-PCR (b) analyses for relative mRNA levels of miRNA biogenesis factors by E<sub>2</sub> (200 ng) and/or P<sub>4</sub> (2 mg) in the uteri of ovariectomized mice at different time points (n=5 for each group). *Egr1* and *Ltf* were used as positive controls for early and late estrogen responses, respectively. *Areg* and *Hoxa10*, and *Ptgs1* were for P<sub>4</sub> and E<sub>2</sub>+P<sub>4</sub> responses, respectively.

**Figure S4. Analyses of E<sub>2</sub>-dependent expression of miRNA biogenesis components via nuclear estrogen receptor(s).** Expression patterns of *Dicer*, *Argo2* and *Xpo5* were analyzed by RT-PCR (a) and realtime RT-PCR (b-d) to examine whether nuclear estrogen receptor(s) are involved in E<sub>2</sub>-dependent expression of these genes. Ovariectomized mice were treated with ICI 182, 780, a nuclear estrogen receptor antagonist, 30 min before E<sub>2</sub> (200 ng) treatments and sacrificed 3 h after E<sub>2</sub> administration (n=4 to 7 for each group). Unpaired Student *t*-test, \**p*<0.05.

**Figure S5. TUNEL assays for the uterine sections of 3- and 5-week-old Dgcr8<sup>d/d</sup> mice.**

(a) Microscopic images for apoptotic cells (green) counterstained with DAPI (blue) in uterine sections from Dgcr8<sup>fl/fl</sup> and Dgcr8<sup>d/d</sup> mice. Note that uteri of both Dgcr8<sup>fl/fl</sup> and Dgcr8<sup>d/d</sup> mice at 3 and 5 weeks of age were negative in the TUNEL assays. Scale bar: 50  $\mu$ m. (b) Realtime RT-PCR for expression of apoptosis marker genes (Bcl2l11, Aldh1a3, and Fas) in the uteri of 3- and 5-week-old Dgcr8<sup>fl/fl</sup> and Dgcr8<sup>d/d</sup> mice.

**a**

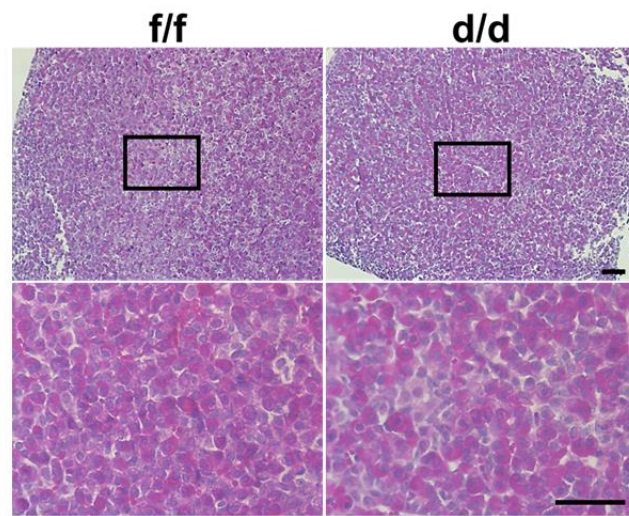

**b**

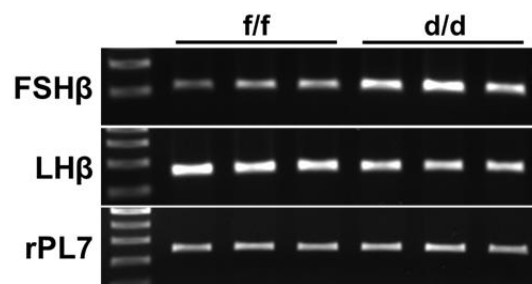

**a**

oil

f/f

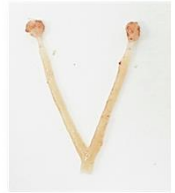

d/d

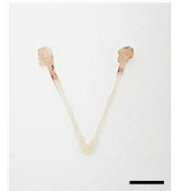

**b**

ovary

oviduct

uterus

f/f

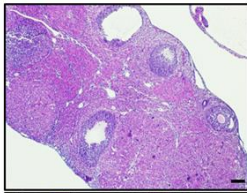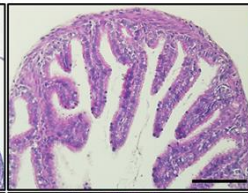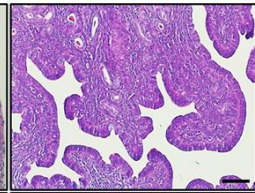

d/d

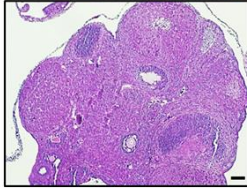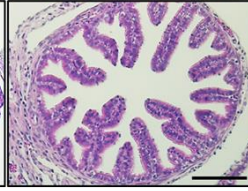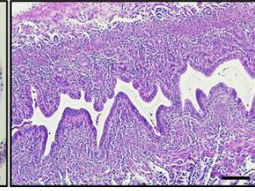

**a**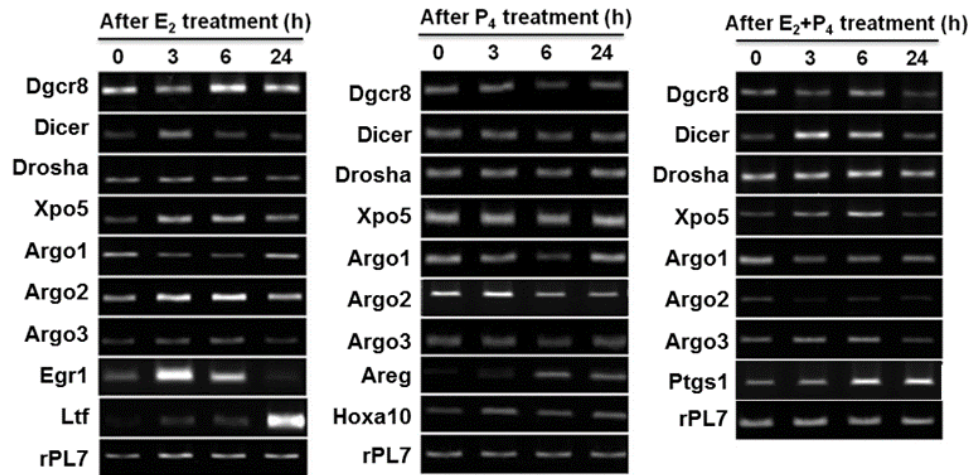**b**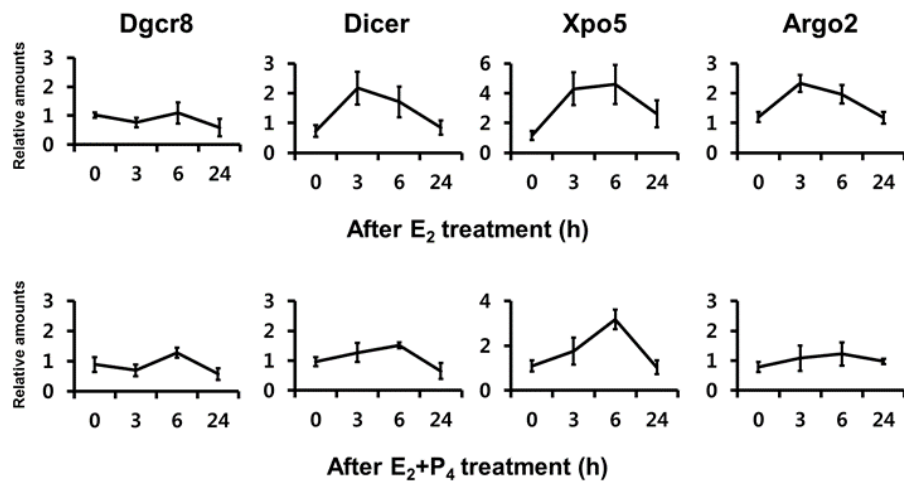

**a**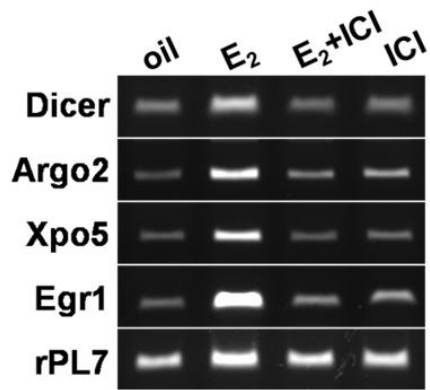**b**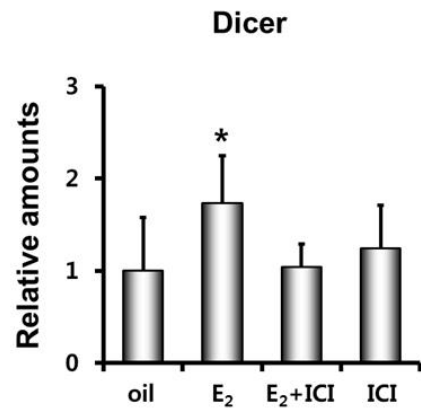**c**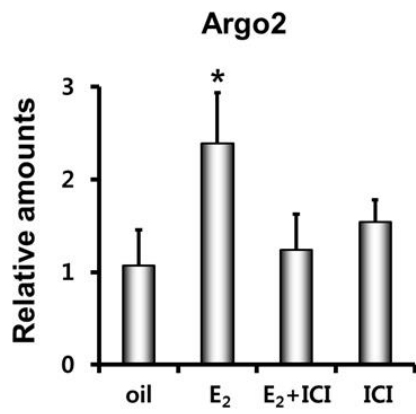**d**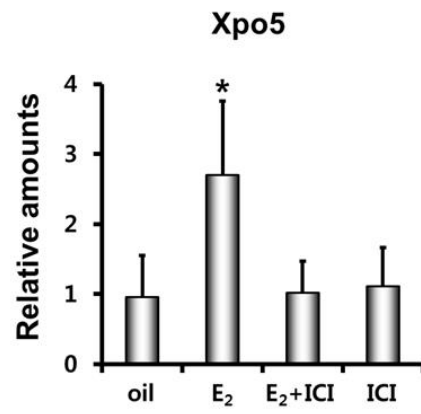

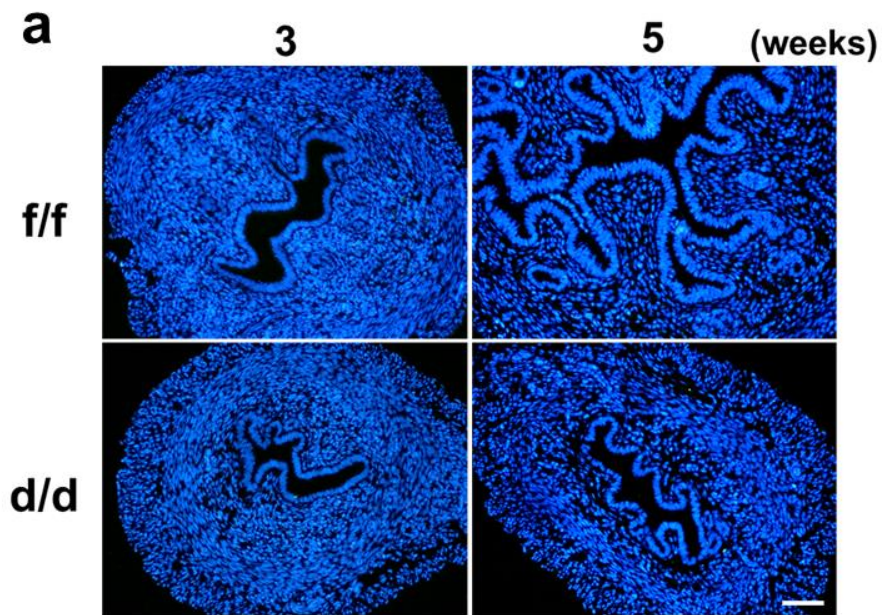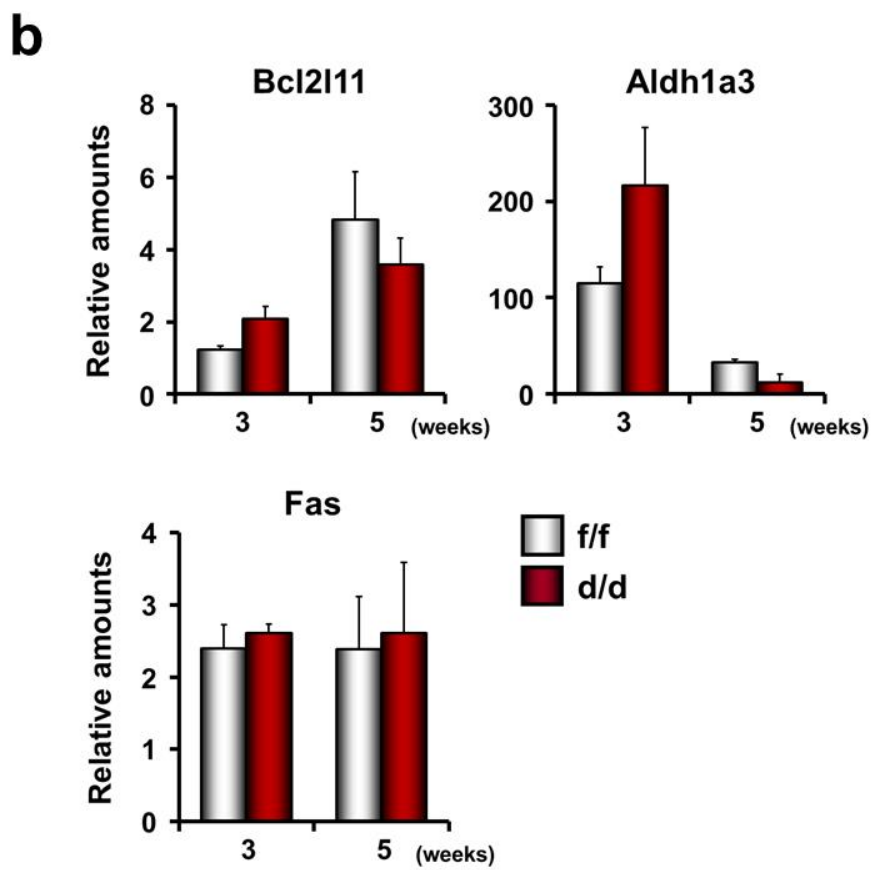

Supplement: srep20242-s1.pdf [file srep20242-s1.pdf]
